# Supplementary material for: Vertical particle concentration profiles around urban office buildings
Source: Copernicus journal article supplement (doi:10.5194/acp-12-5017-2012), 2012-06-07
Supplement: Supplementary file 1 [file acp-12-5017-2012-supplement.pdf]

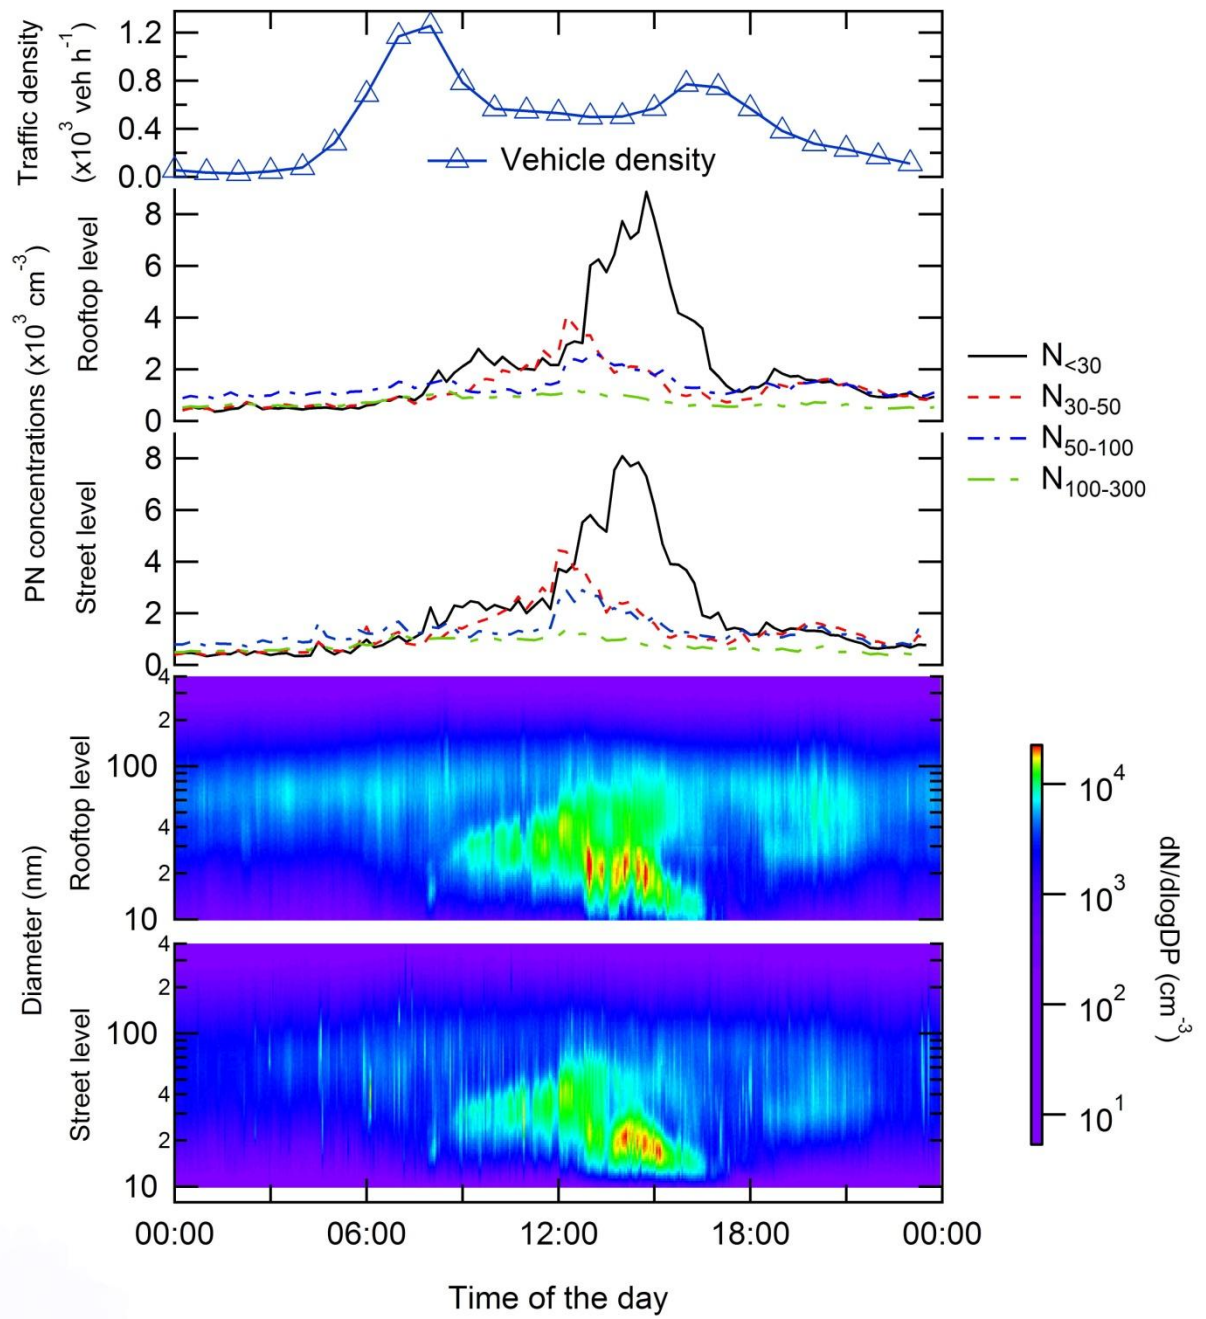

**Fig. S1.** Daily variation of PNSD and PN size fraction concentrations at Building B.

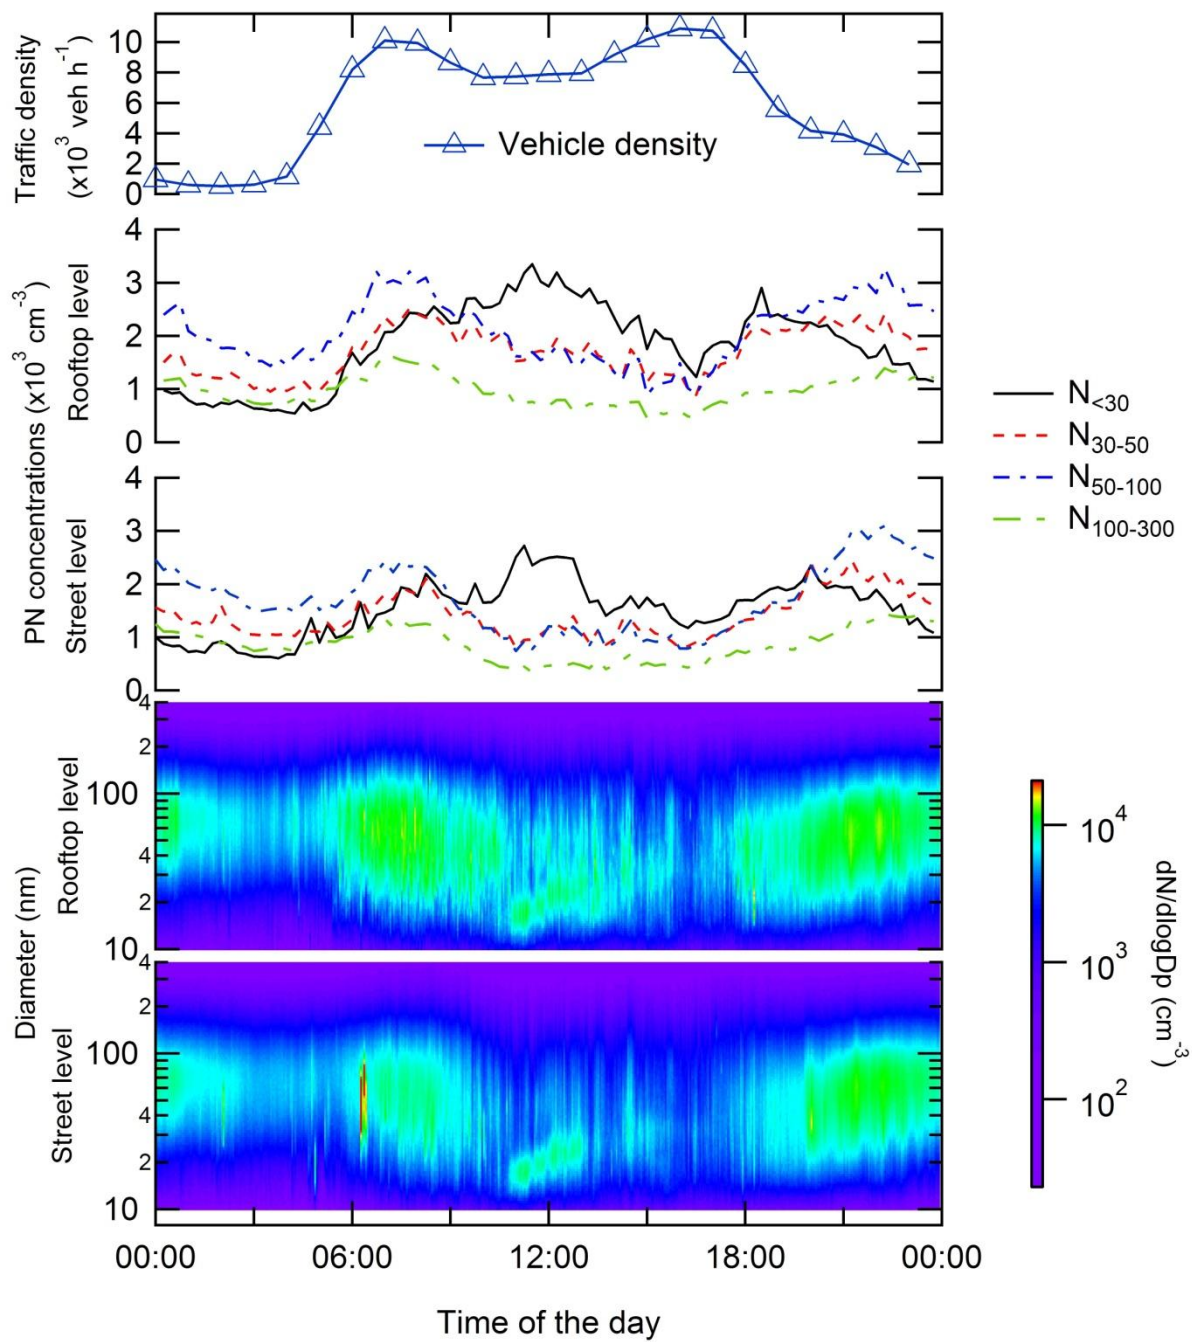

**Fig. S2.** Daily variation of PNSD and PN size fraction concentrations at Building C.

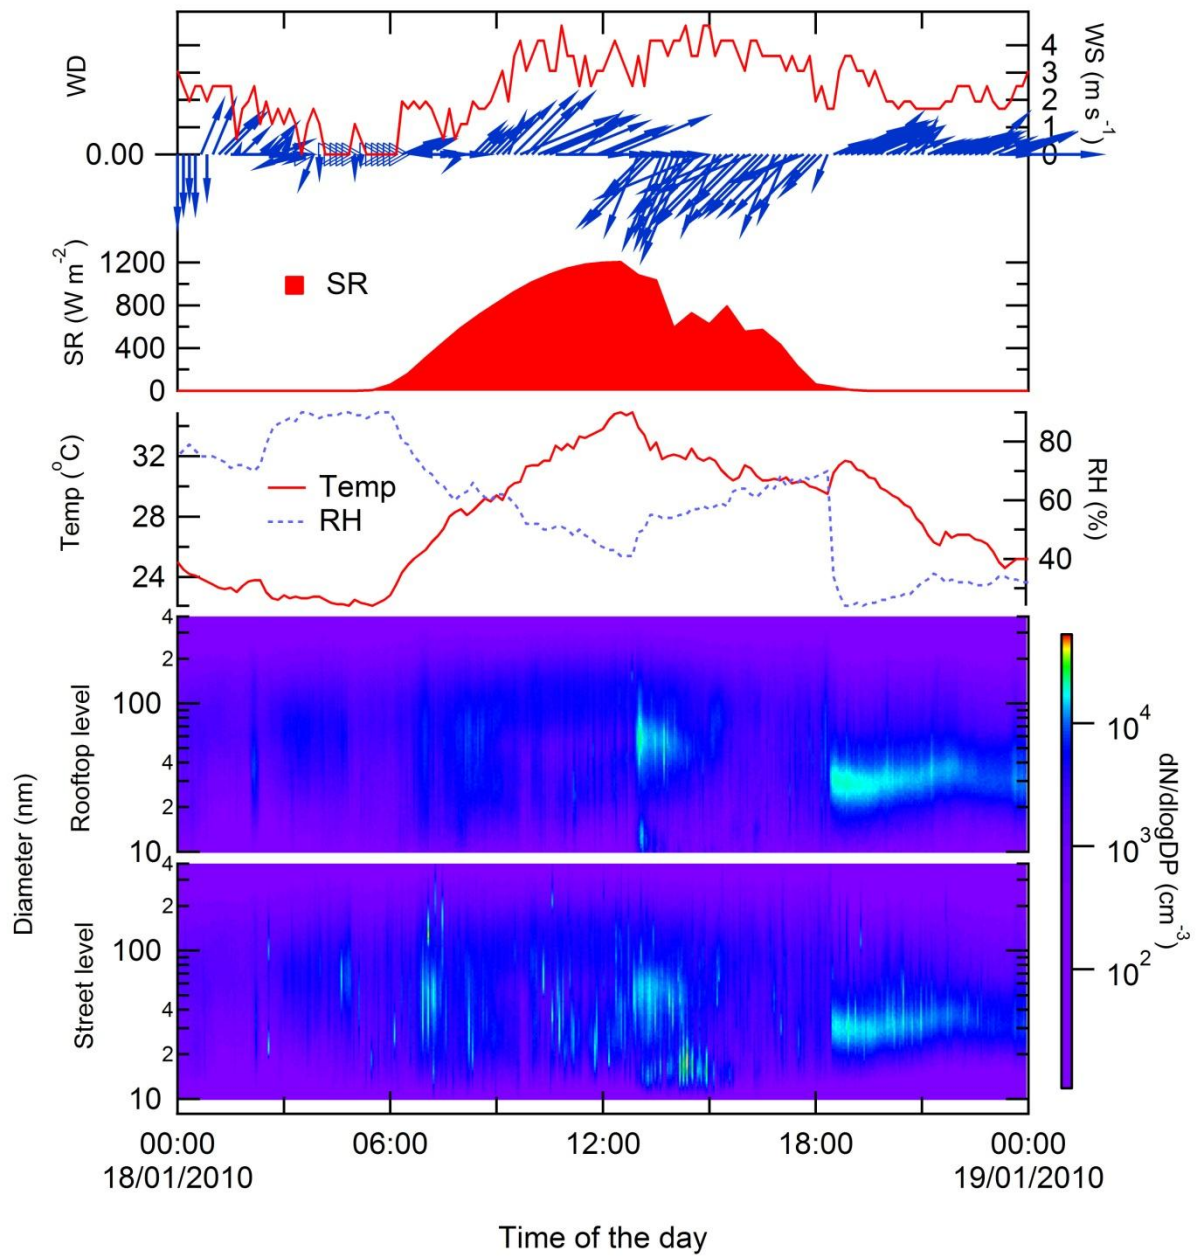

**Fig. S3.** PNSD spectra at Building B on a week day characterised by the non- or unclear nucleation events.

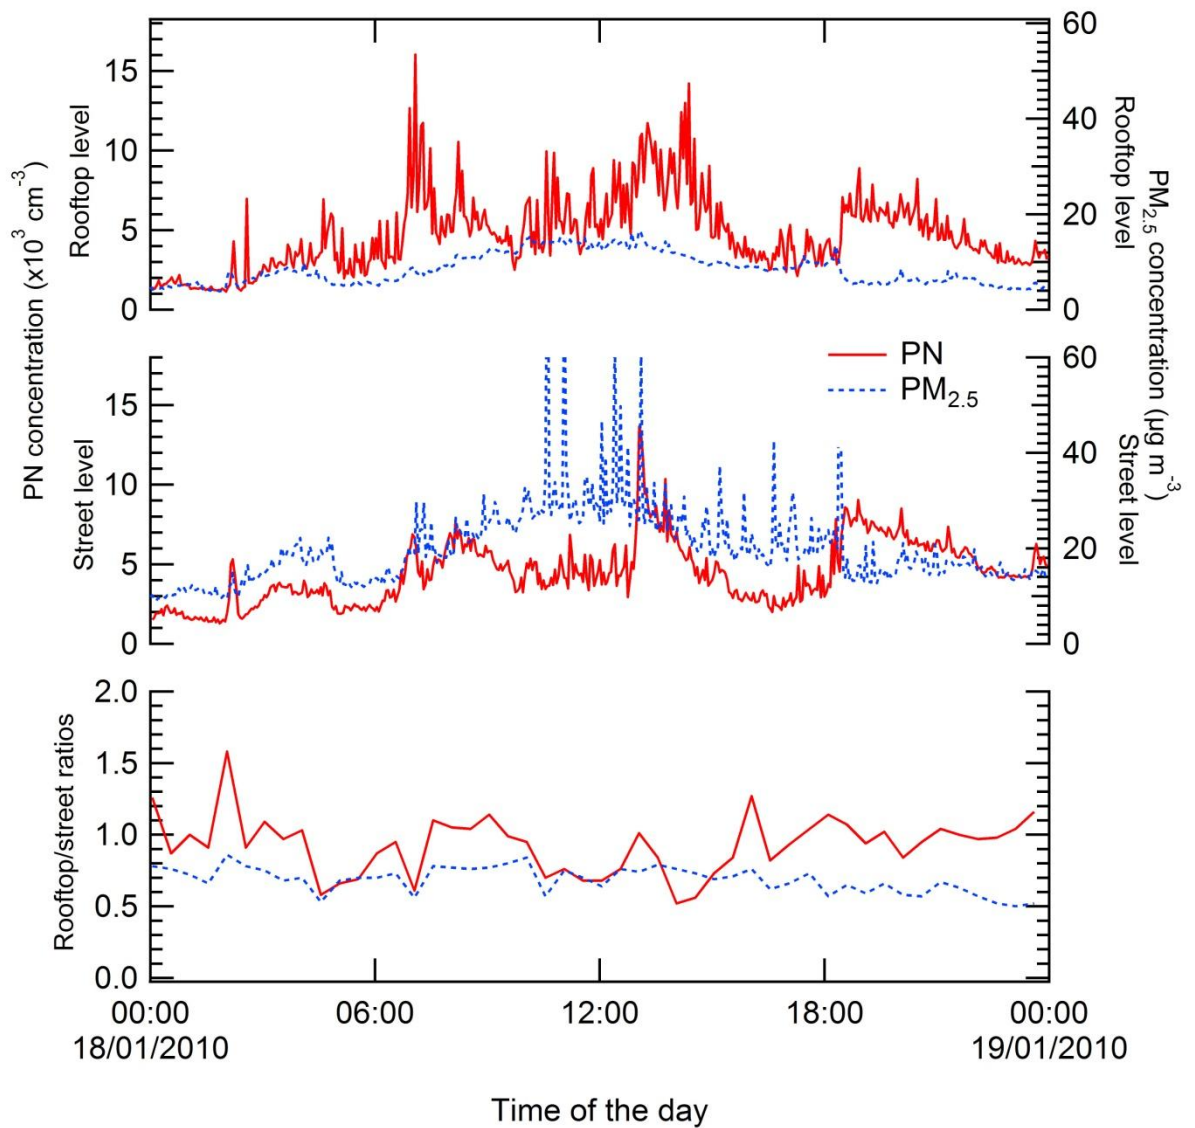

**Fig. S4.** Average particle concentrations and their rooftop to street level ratios at Building B on a weekday characterised by the non- or unclear nucleation events.

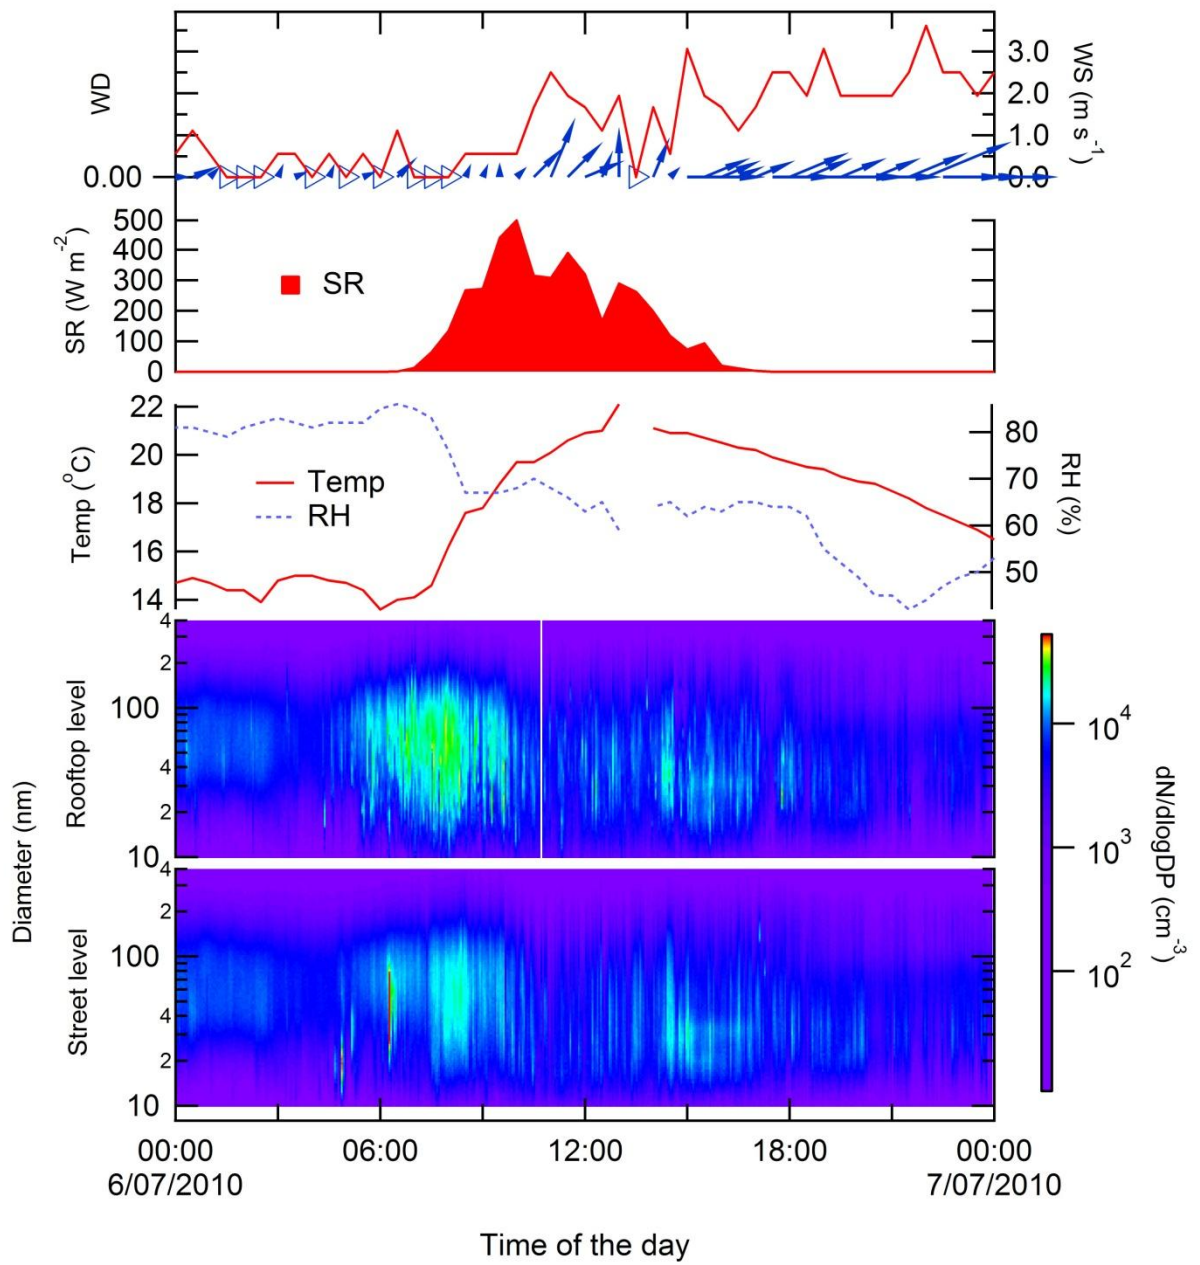

**Fig. S5.** PNSD spectra at Building C on a weekday characterised by the non- or unclear nucleation events.

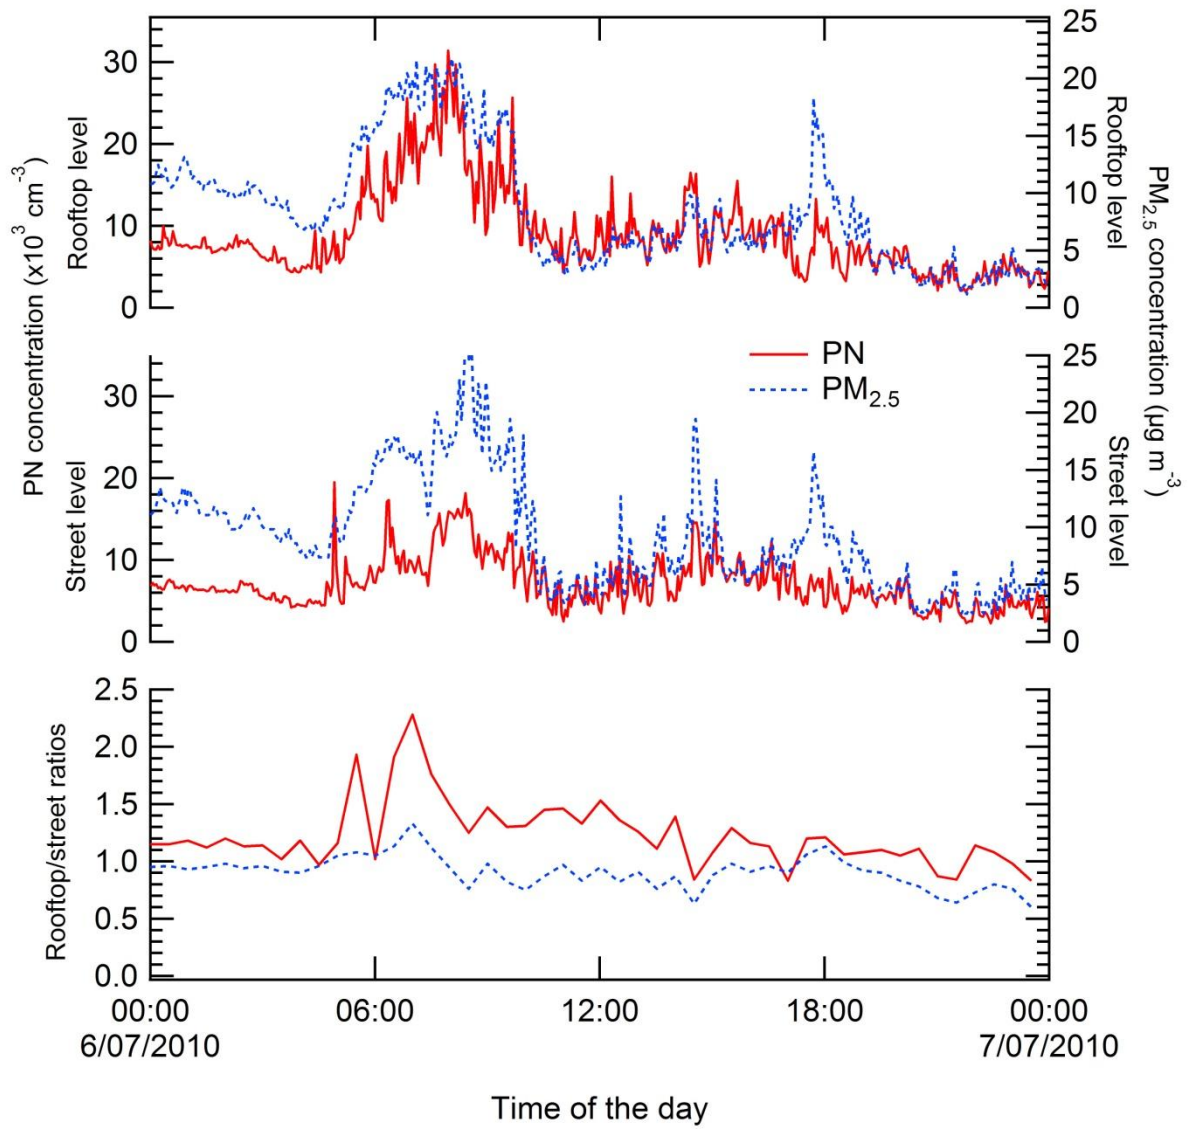

**Fig. S6.** Average particle concentrations and their rooftop to street level ratios at Building C on a weekday characterised by the non- or unclear nucleation events.

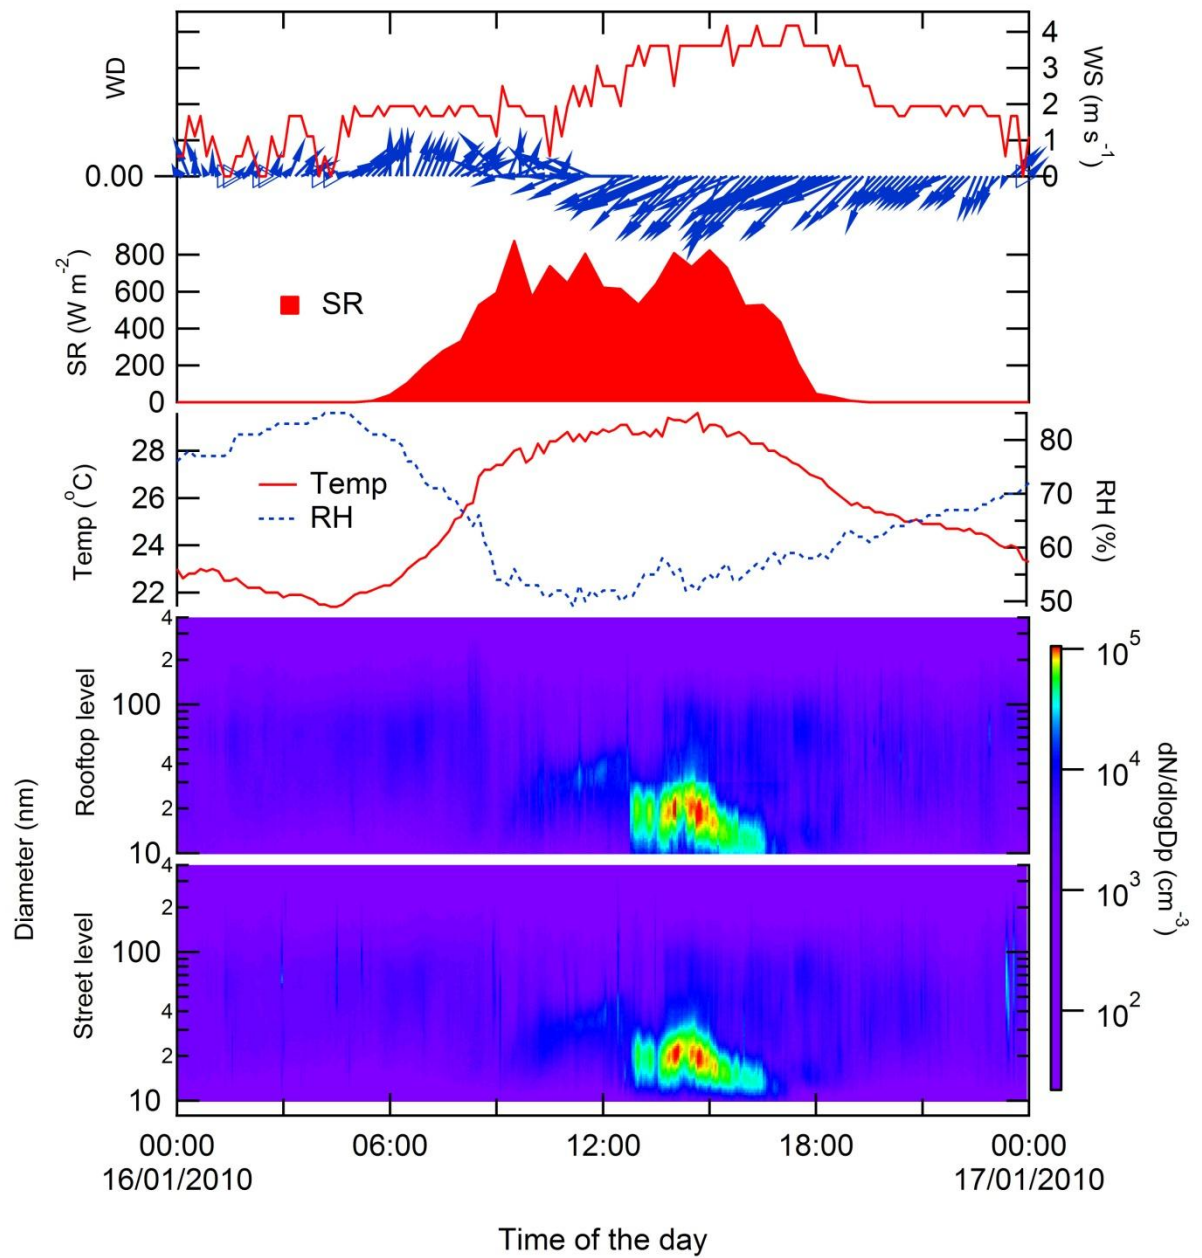

**Fig. S7.** PNSD spectra at Building B on a nucleation event day.

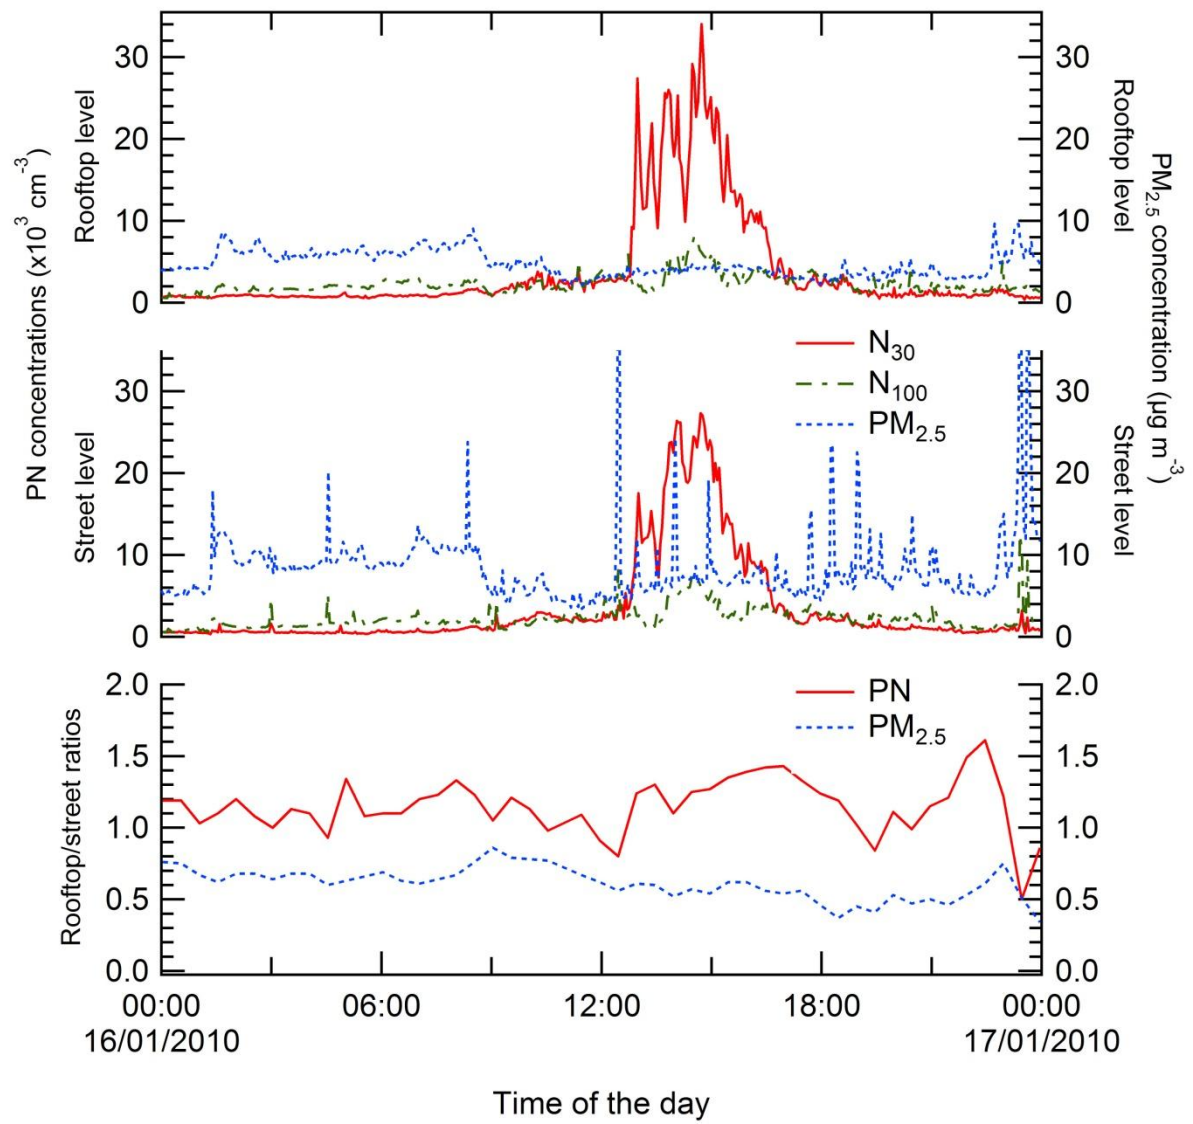

**Fig. S8.** Particle concentrations and their rooftop to street level ratios at Building B on a nucleation event day.



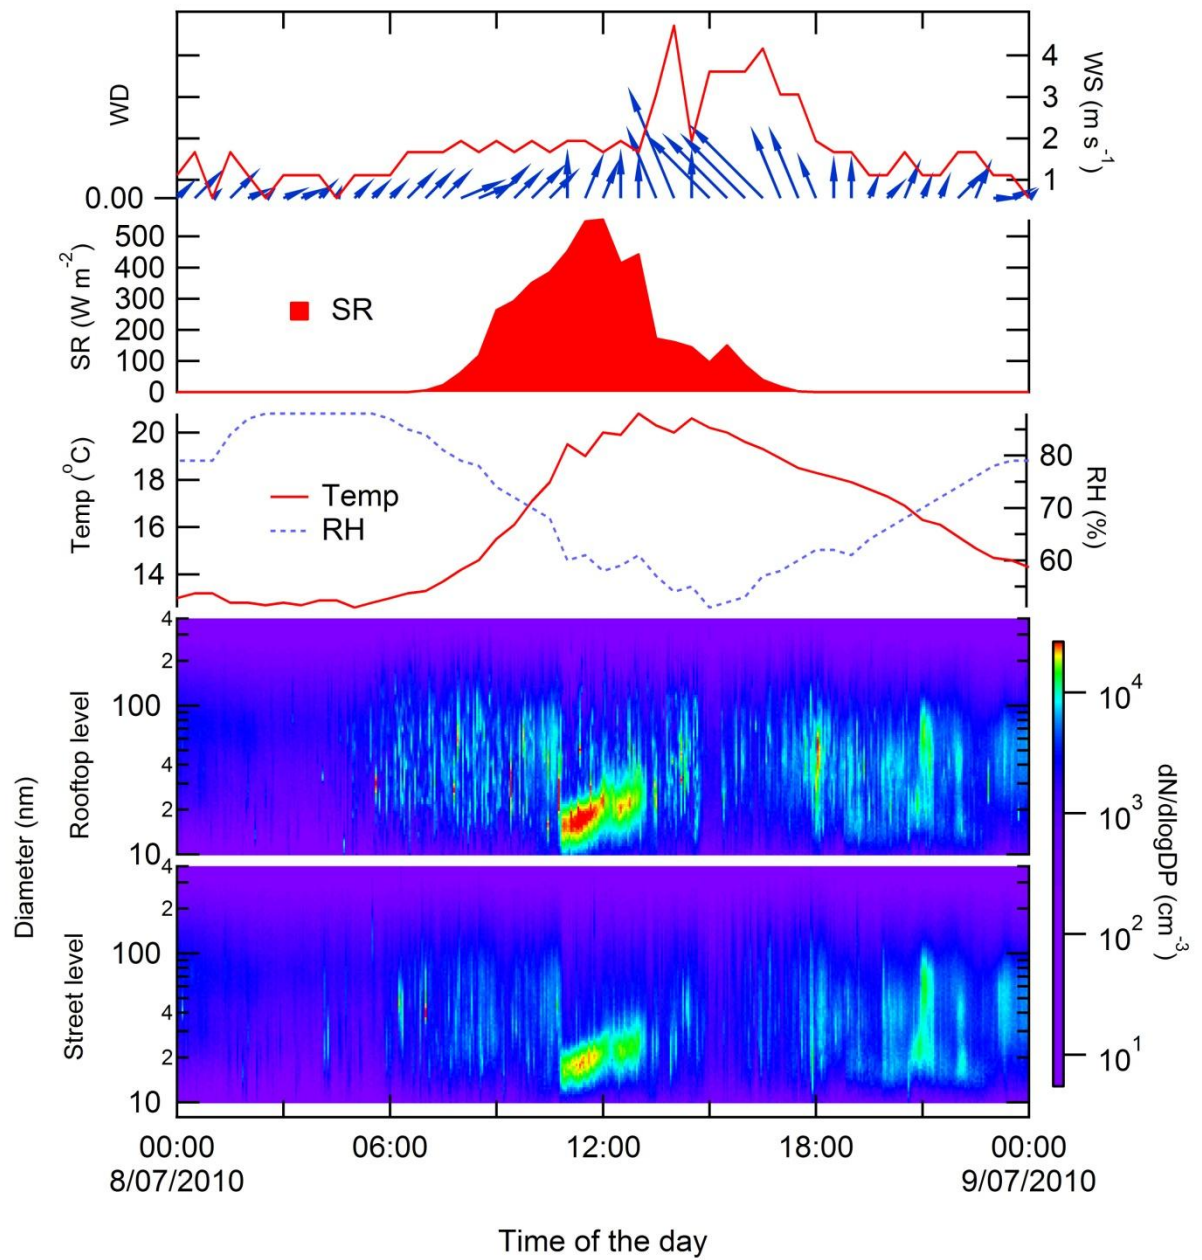

**Fig. S9.** PNSD spectra at Building C on a nucleation event day.

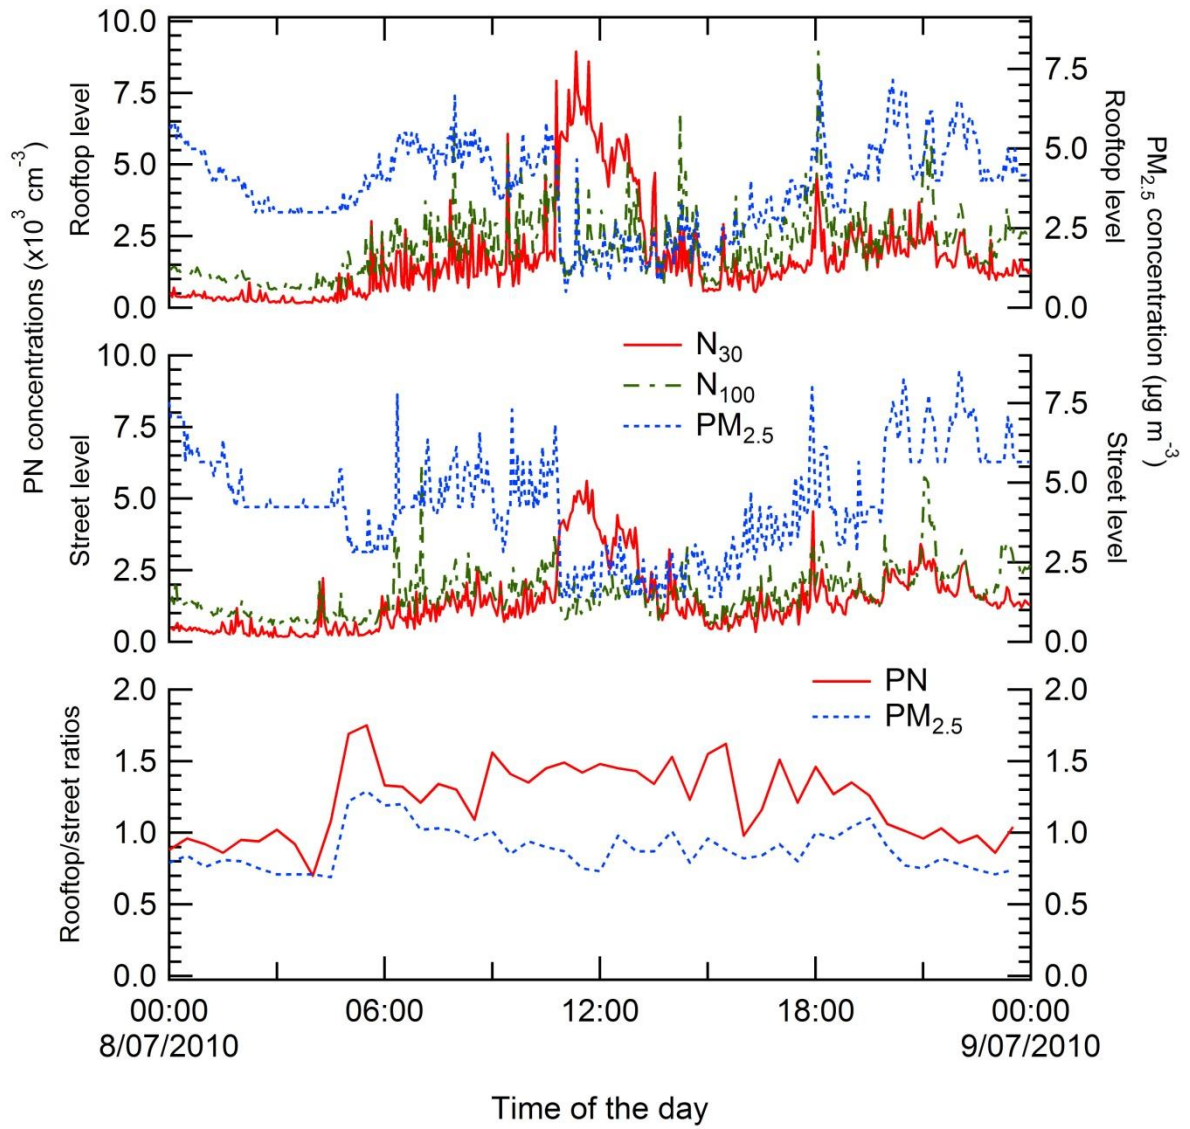

**Fig. S10.** Particle concentrations and their rooftop to street level ratios at Building C on a nucleation event day.

**Table S1.** Summary of conditions during nucleation events\*

| Site            | Date            | Local time | SR<br>W m <sup>-2</sup> | WD   | WS<br>M s <sup>-1</sup> | Temp<br>°C | RH<br>% |
|-----------------|-----------------|------------|-------------------------|------|-------------------------|------------|---------|
| Building A      | 25 July 2009    | 10:45      | 722                     | SE   | 4.17                    | 19.3       | 46      |
|                 | 31 July 2009    | 13:45      | 735                     | W    | 3.61                    | 21         | 32      |
|                 | 1 August 2009   | 10:45      | 749                     | SW   | 2.5                     | 18.2       | 47      |
|                 | 2 August 2009   | 11:30      | 781                     | WSW  | 2.5                     | 19.7       | 55      |
|                 | 3 August 2009   | 13:30      | 738                     | WNW  | 4.17                    | 23.2       | 32      |
|                 | 8 August 2009   | 13:30      | 752                     | E    | 2.5                     | 22.1       | 43      |
|                 | 9 August 2009   | 9:45       | 656                     | SW   | 2.5                     | 15.5       | 53      |
| Building B      | 16 January 2010 | 12:45      | 614                     | NE   | 3.61                    | 28.7       | 51      |
|                 | 17 January 2010 | 8:30       | 709                     | NNE  | 2.5                     | 27.4       | 58      |
|                 | 20 January 2010 | 12:00      | 1227                    | NE   | 3.06                    | 30.6       | 34      |
|                 | 21 January 2010 | 11:15      | 1193                    | NE   | 1.94                    | 31.4       | 47      |
|                 | 22 January 2010 | 10:30      | 410                     | ENE  | 1.94                    | 28.2       | 55      |
|                 | 23 January 2010 | 14:00      | 1094                    | ENE  | 4.17                    | 31         | 45      |
|                 | 24 January 2010 | 14:00      | 1100                    | ENE  | 3.61                    | 31.4       | 47      |
|                 | 26 January 2010 | 10:00      | 1007                    | N    | 1.94                    | 30.2       | 50      |
| 27 January 2010 | 11:00           | 1116       | NE                      | 3.61 | 32.7                    | 48         |         |
| Building C      | 4 July 2010     | 9:30       | 471                     | SW   | 1.94                    | 13.4       | 53      |
|                 | 5 July 2010     | 12:30      | 368                     | SSE  | 1.67                    | 21.9       | 49      |
|                 | 8 July 2010     | 10:45      | 452                     | SSW  | 1.94                    | 19.5       | 60      |

\* The data in the table present events observed at the reference sites of Buildings A, B and C.

**Table S2.** Spearman's correlation coefficients ( $\rho$ ) for PNSD and PM<sub>2.5</sub> concentration around the building envelopes

| Site       | Measured height | Time period | Spearman's correlation coefficient ( $\rho$ ) |                     |                      |        |
|------------|-----------------|-------------|-----------------------------------------------|---------------------|----------------------|--------|
|            |                 |             | N <sub>&lt;30</sub>                           | N <sub>30-100</sub> | N <sub>&gt;100</sub> | TNC    |
| Building A | 1.5 m           | Daily       | 0.05                                          | 0.68**              | 0.80**               | 0.63** |
|            |                 | Rush-hours  | 0.21                                          | 0.22                | 0.78**               | 0.24   |
|            |                 | Nucleation  | 0.49                                          | 0.63*               | 0.66*                | 0.48   |
|            | 6.5 m           | Daily       | 0.04                                          | 0.85**              | 0.94**               | 0.67** |
|            |                 | Rush-hours  | 0.46*                                         | 0.66**              | 0.52**               | 0.56** |
|            |                 | Nucleation  | 0.26                                          | 0.69**              | 0.71**               | 0.69** |
|            | 10.5 m          | Daily       | -0.20*                                        | 0.72**              | 0.88**               | 0.29** |
|            |                 | Rush-hours  | 0.12                                          | 0.77**              | 0.80**               | 0.49** |
|            |                 | Nucleation  | 0.17                                          | 0.72**              | 0.36                 | 0.18   |
| 14.5 m     | Daily           | -0.11       | 0.84**                                        | 0.96**              | 0.43**               |        |
|            | Rush-hours      | 0.27        | 0.60**                                        | 0.67**              | 0.51**               |        |
|            | Nucleation      | -0.03       | 0.73**                                        | 0.90**              | 0.39*                |        |
| Building B | 1.5 m           | Daily       | 0.53**                                        | 0.69**              | 0.82**               | 0.72** |
|            |                 | Rush-hours  | 0.13                                          | 0.20                | 0.64**               | 0.38   |
|            |                 | Nucleation  | 0.66**                                        | 0.65**              | 0.57**               | 0.65** |
|            | 78.5 m          | Daily       | 0.69**                                        | 0.82**              | 0.89**               | 0.84** |
|            |                 | Rush-hours  | 0.22                                          | 0.35                | 0.76**               | 0.43*  |
|            |                 | Nucleation  | 0.78**                                        | 0.85**              | 0.87**               | 0.87** |
| Building C | 1.5 m           | Daily       | 0.50**                                        | 0.40**              | 0.44**               | 0.45** |
|            |                 | Rush-hours  | 0.46*                                         | 0.33                | 0.5*                 | 0.41*  |
|            | 5.5 m           | Daily       | 0.37*                                         | 0.74**              | 0.75**               | 0.68** |
|            |                 | Rush-hours  | 0.55**                                        | 0.57**              | 0.82**               | 0.61** |
|            | 9.5 m           | Daily       | 0.40*                                         | 0.85**              | 0.9**                | 0.79** |
|            |                 | Rush-hours  | 0.62**                                        | 0.68**              | 0.68**               | 0.69** |
|            | 21.5 m          | Daily       | 0.56**                                        | 0.79**              | 0.60**               | 0.74** |
|            |                 | Rush-hours  | 0.31                                          | 0.44*               | 0.38*                | 0.46*  |

\*. Correlation is significant at the 0.05 level (2-tailed)

\*\*. Correlation is significant at the 0.01 level (2-tailed)
